# Supplementary material for: Blocking autocrine VEGF signaling by sunitinib, an anti-cancer drug, promotes embryonic stem cell self-renewal and somatic cell reprogramming
Source: PubMed Central journal article supplement — Cell Res. 2014 Aug 22;24(9):1121–36. doi: 10.1038/cr.2014.112 (PMC4152737; doi:10.1038/cr.2014.112), 2014-08-22
Supplement: cr2014112x1.pdf [file cr2014112x1.pdf]

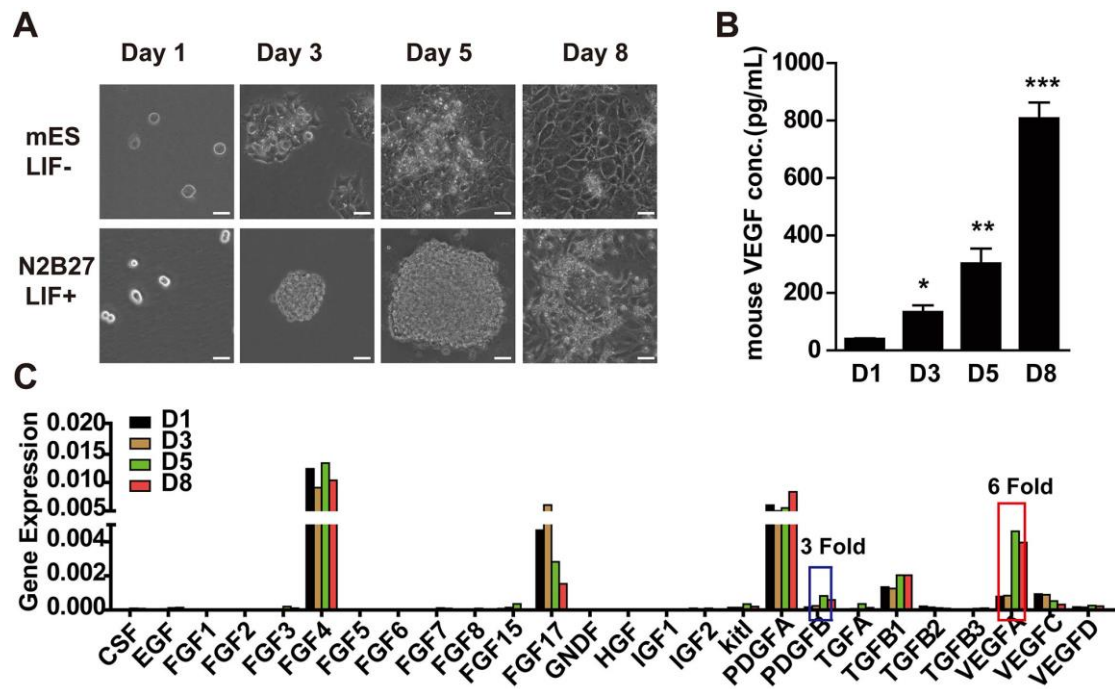

**Supplementary information, Figure S1** Expression Profiling of growth factors in mESCs.

(A) Morphology of E14 cells cultured in mES medium (LIF-) (top) or N2B27 medium (LIF+) (bottom) without passage for 1-8 days, medium were changed every day (Scale bar: 50  $\mu$ m). (B) ELISA analysis of VEGFA secretion by E14 cells cultured in N2B27 medium (LIF+) described in (A). (C) qRT-PCR analysis of growth factor gene expression relative to *GAPDH* of E14 cells cultured in mES medium (LIF+) without passage for 1-8 days, medium were changed every day. *VEGFA* has both higher expression and bigger change (6 Fold) from day 3 to day 5 of all the growth factors marked by red rectangular, *PDGFB* is the next higher expression and bigger change (3 Fold) from day 3 to day 5 growth factor following behind than *VEGFA* marked by blue rectangular.
