# Supplementary material for: Blocking autocrine VEGF signaling by sunitinib, an anti-cancer drug, promotes embryonic stem cell self-renewal and somatic cell reprogramming
Source: PubMed Central journal article supplement — Cell Res. 2014 Aug 22;24(9):1121–36. doi: 10.1038/cr.2014.112 (PMC4152737; doi:10.1038/cr.2014.112), 2014-08-22
Supplement: cr2014112x3.pdf [file cr2014112x3.pdf]

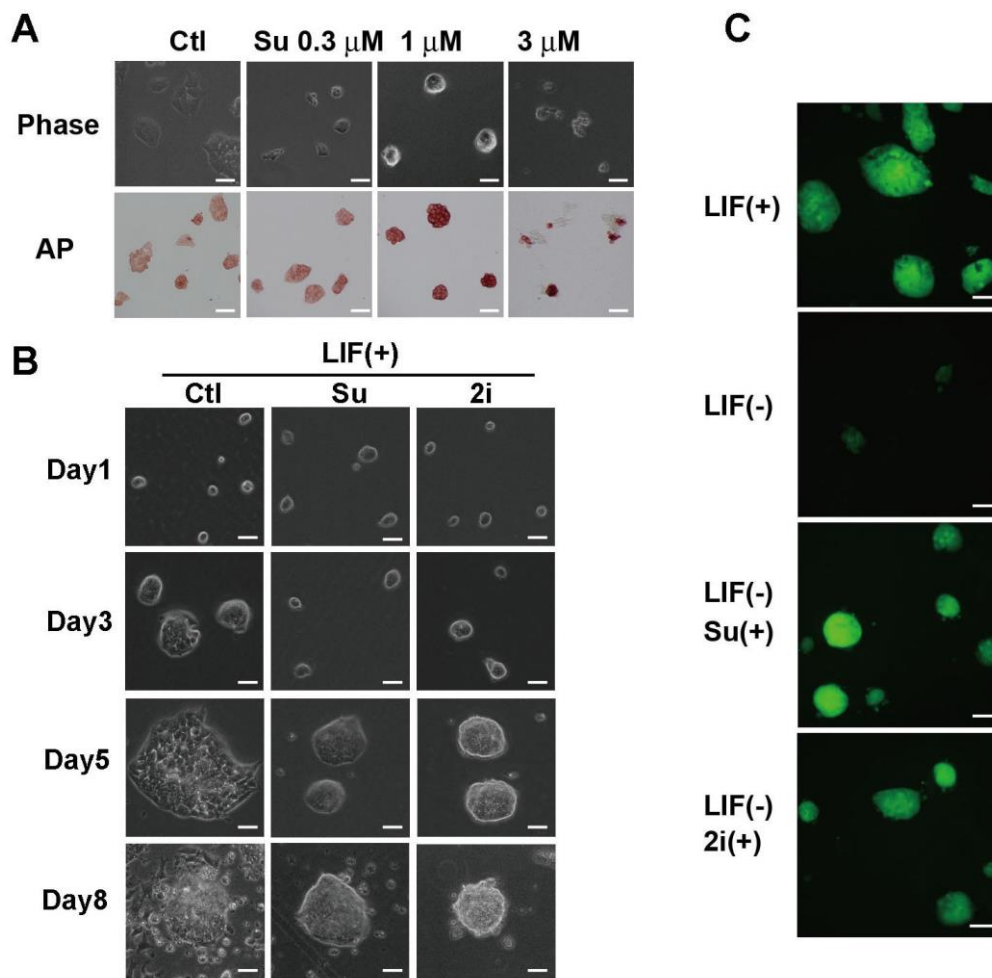

**Supplementary information, Figure S3** Sunitinib maintains self-renewal of pluripotent stem cell.

(A) Morphology and AP staining of E14 cells cultured in mES media (LIF-) supplemented with 0.3  $\mu$ M, 1  $\mu$ M or 3  $\mu$ M sunitinib (Su) for 2 days (Scale bar: 50  $\mu$ m). (B) Morphology of E14 cells cultured in mES media (LIF+) supplemented with sunitinib (1  $\mu$ M) or 2i (3  $\mu$ M PD0325901 and 3  $\mu$ M CHIR99021) without passage for 1-8 days, media were change everyday (Scale bar: 50  $\mu$ m). (C) Oct4-GFP expression in iPSCs maintained in mES media containing indicated compounds with or without LIF (1000U/mL). (Scale bar: 50  $\mu$ m). Independent experiments were repeated at least three times.
