# Supplementary material for: Blocking autocrine VEGF signaling by sunitinib, an anti-cancer drug, promotes embryonic stem cell self-renewal and somatic cell reprogramming
Source: PubMed Central journal article supplement — Cell Res. 2014 Aug 22;24(9):1121–36. doi: 10.1038/cr.2014.112 (PMC4152737; doi:10.1038/cr.2014.112), 2014-08-22
Supplement: cr2014112x4.pdf [file cr2014112x4.pdf]

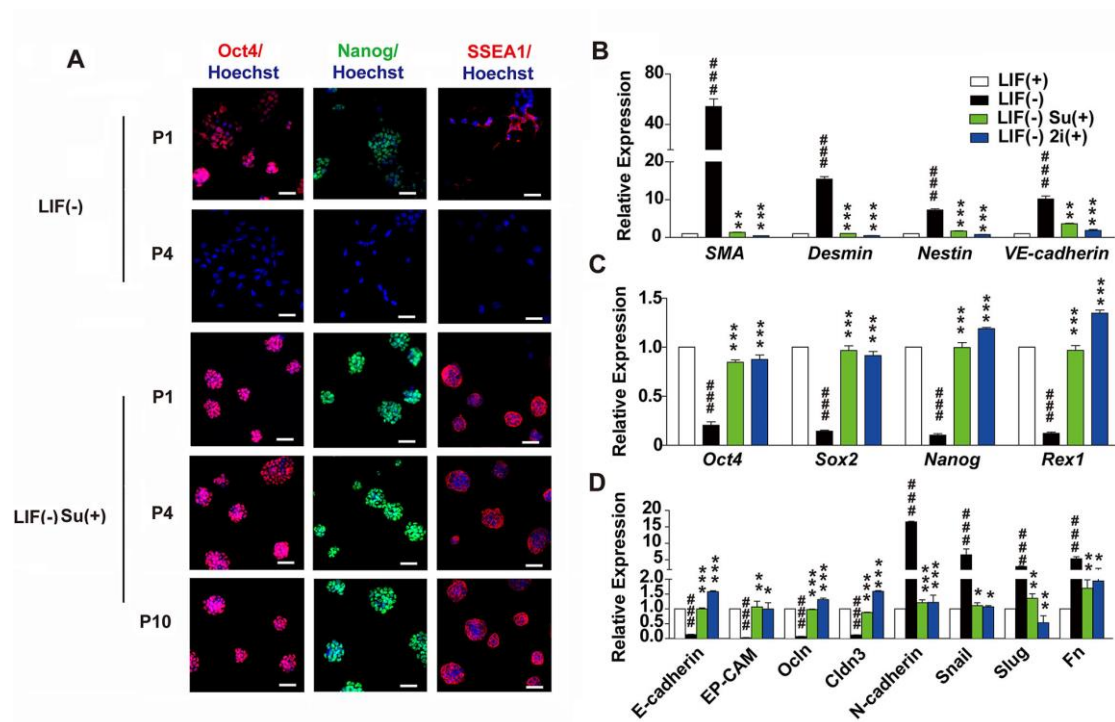

**Supplementary information, Figure S4** Sunitinib maintains the self-renewal and pluripotency of mESCs.

(A) Immunofluorescence staining of pluripotency markers (Oct4, Nanog, SSEA1) in E14 cells at passage 1, 4 and 10 maintained in mES medium containing 1000 U/mL LIF, or in mES medium without LIF but containing 2i (3  $\mu$ M PD0325901 and 3  $\mu$ M CHIR99021) or sunitinib (1  $\mu$ M). Cell nuclei were stained with Hoechst (Scale bar: 80  $\mu$ m). (B-D) qRT-PCR analysis of lineage specific genes (B), pluripotency genes (C) and EMT related genes (D) in cells described in (A) (passage 4). Data are mean  $\pm$  SEM (n=3), ###p<0.001 vs LIF positive condition; \*p < 0.05, \*\*p < 0.01, \*\*\*p < 0.001vs LIF negative condition. Independent experiments were repeated at least three times.
