# Supplementary material for: Blocking autocrine VEGF signaling by sunitinib, an anti-cancer drug, promotes embryonic stem cell self-renewal and somatic cell reprogramming
Source: PubMed Central journal article supplement — Cell Res. 2014 Aug 22;24(9):1121–36. doi: 10.1038/cr.2014.112 (PMC4152737; doi:10.1038/cr.2014.112), 2014-08-22
Supplement: cr2014112x5.pdf [file cr2014112x5.pdf]

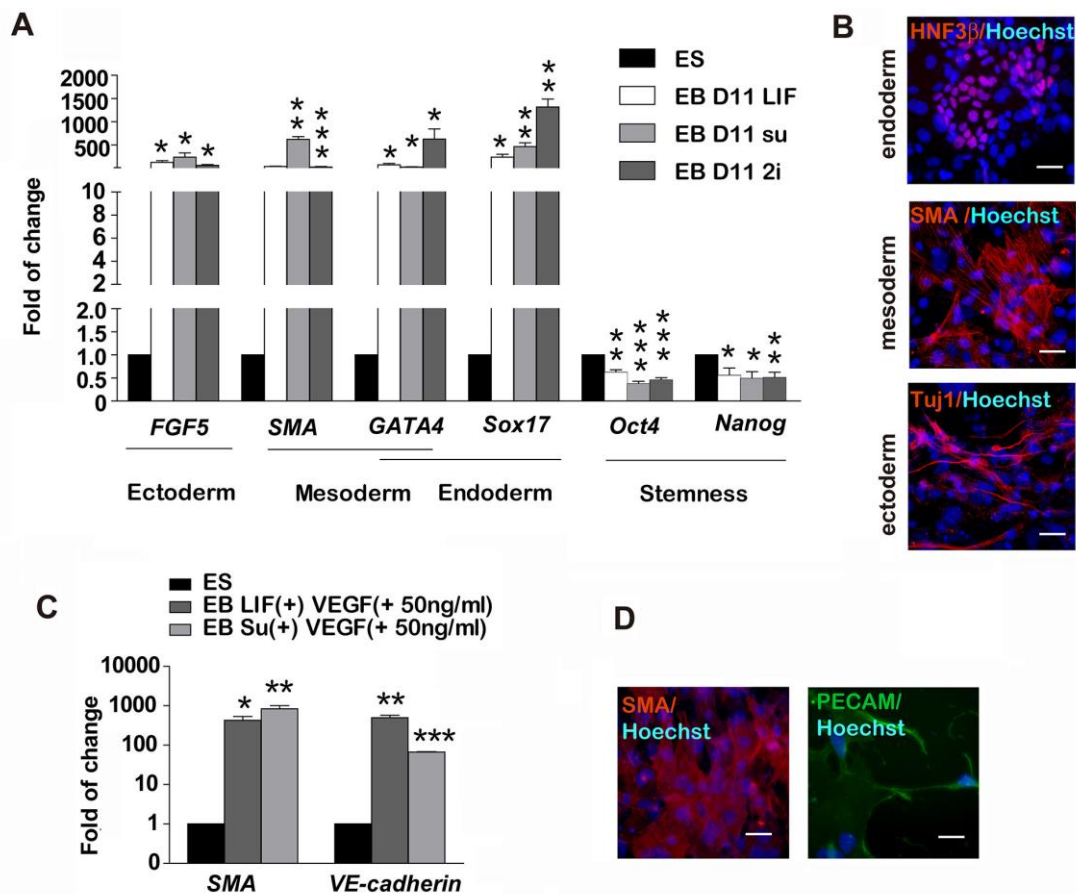

**Supplementary information, Figure S5** *In vitro* differentiation of mESCs maintained in sunitinib-containing medium.

(A) qRT-PCR analysis of lineage specific genes in EBs (day 11) derived from E14 cells maintained in LIF, sunitinib (1  $\mu$ M) or 2i (3  $\mu$ M PD0325901 + 3  $\mu$ MCHIR99021) for 11 passages. All chemicals were removed during EB formation. (B) Immunostaining of endoderm (HNF-3 $\beta$ ), mesoderm (SMA), and ectoderm (Tuj1) markers in EBs (day12) derived from E14 cells cultured in LIF-free mES medium supplemented with 1  $\mu$ M sunitinib for 11 passages. Nuclei were stained with Hoechst 33342. (Scale bar: 10  $\mu$ m). (C and D) VEGF induced differentiation. EBs were formed in hanging drop for 2 days and then attached onto 0.1% gelatin-coated 24-well plate (10-15 EBs per well) in DMEM medium with 10% FBS. On the next day, vascular differentiation medium supplemented with 50 ng/mL mVEGF<sub>164</sub> were used to culture the EBs up to 14 days. The vascular markers were analyzed by qRT-PCR (C) and immunofluorescent staining (D). Data are mean  $\pm$  SEM (n=3), \*p < 0.05, \*\*p < 0.01, \*\*\*p < 0.001 vs ES cells.
