# Supplementary material for: Blocking autocrine VEGF signaling by sunitinib, an anti-cancer drug, promotes embryonic stem cell self-renewal and somatic cell reprogramming
Source: PubMed Central journal article supplement — Cell Res. 2014 Aug 22;24(9):1121–36. doi: 10.1038/cr.2014.112 (PMC4152737; doi:10.1038/cr.2014.112), 2014-08-22
Supplement: cr2014112x6.pdf [file cr2014112x6.pdf]

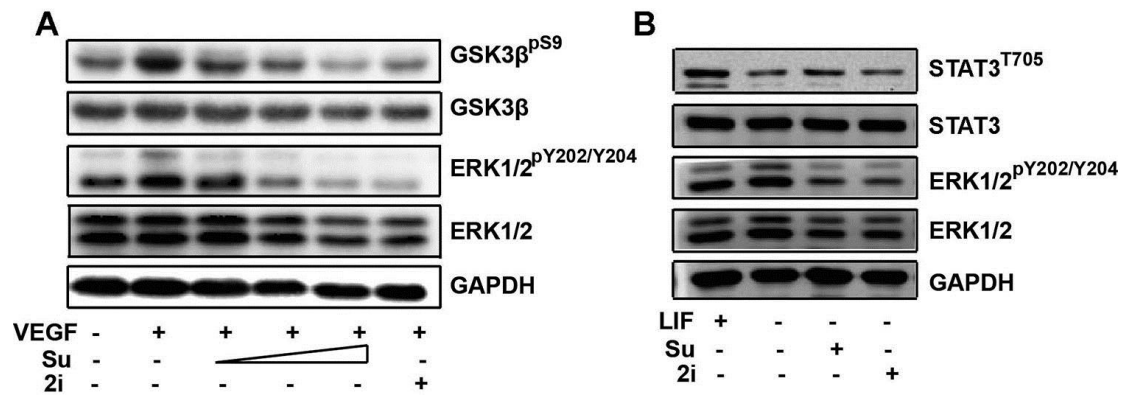

**Supplementary information, Figure S6** Sunitinib does not activate Stat3 pathway but blocks VEGF-mediated activation of GSK3 $\beta$  and ERK.

(A) Western blot analysis of GSK3 $\beta$  and ERK1/2 phosphorylation in E14 cells cultured in LIF containing mES media supplemented with VEGF, sunitinib (1  $\mu$ M) or 2i (3  $\mu$ M PD0325901 and 3  $\mu$ M CHIR99021) for 48 hrs. Sunitinib and 2i blocked VEGF induced phosphorylation of GSK3 $\beta$  and ERK. (B) Western blot analysis of Stat3 and ERK1/2 phosphorylation in E14 cells cultured in mES media with or without LIF, and sunitinib (1  $\mu$ M) or 2i were added as indicated for 48 hrs. LIF activated Stat3 but failed to block ERK phosphorylation, while sunitinib and 2i failed to activate Stat3 but blocked ERK activation. Independent experiments were repeated at least three times.
