# Supplementary material for: Blocking autocrine VEGF signaling by sunitinib, an anti-cancer drug, promotes embryonic stem cell self-renewal and somatic cell reprogramming
Source: PubMed Central journal article supplement — Cell Res. 2014 Aug 22;24(9):1121–36. doi: 10.1038/cr.2014.112 (PMC4152737; doi:10.1038/cr.2014.112), 2014-08-22
Supplement: cr2014112x7.pdf [file cr2014112x7.pdf]

**A**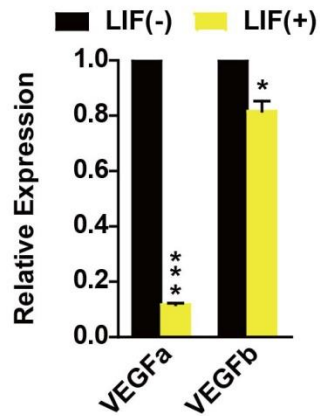**B**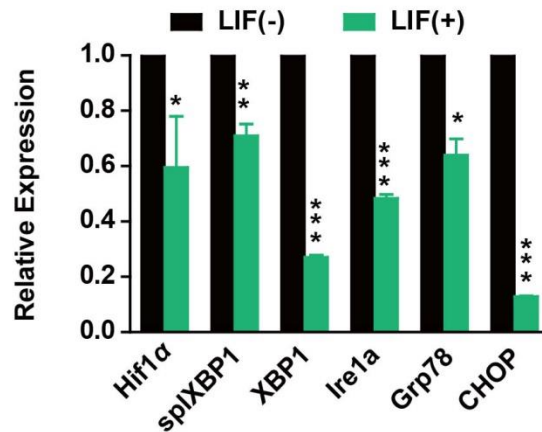

**Supplementary information, Figure S7** LIF inhibits VEGF expression via blocking HIF1 $\alpha$  and ER stress.

(A) qRT-PCR analysis of *VEGFa* and *VEGFb* gene expression in E14 cells cultured in mES medium with or without LIF (1000 U/mL) for 3 days. (B) qRT-PCR analysis of expression of HIF1 $\alpha$  and ER stress related genes (*XBPI*, *spliced XBPI*, *Ire1 $\alpha$* , *Grp78* and *CHOP*) in E14 cells cultured in mES media with or without LIF for 3 days. Data are mean  $\pm$  SEM (n=3), \*p < 0.05, \*\*p < 0.01, \*\*\*p < 0.001 vs LIF (-) group. Independent experiments were repeated at least three times.
