# Supplementary material for: Blocking autocrine VEGF signaling by sunitinib, an anti-cancer drug, promotes embryonic stem cell self-renewal and somatic cell reprogramming
Source: PubMed Central journal article supplement — Cell Res. 2014 Aug 22;24(9):1121–36. doi: 10.1038/cr.2014.112 (PMC4152737; doi:10.1038/cr.2014.112), 2014-08-22
Supplement: cr2014112x8.pdf [file cr2014112x8.pdf]

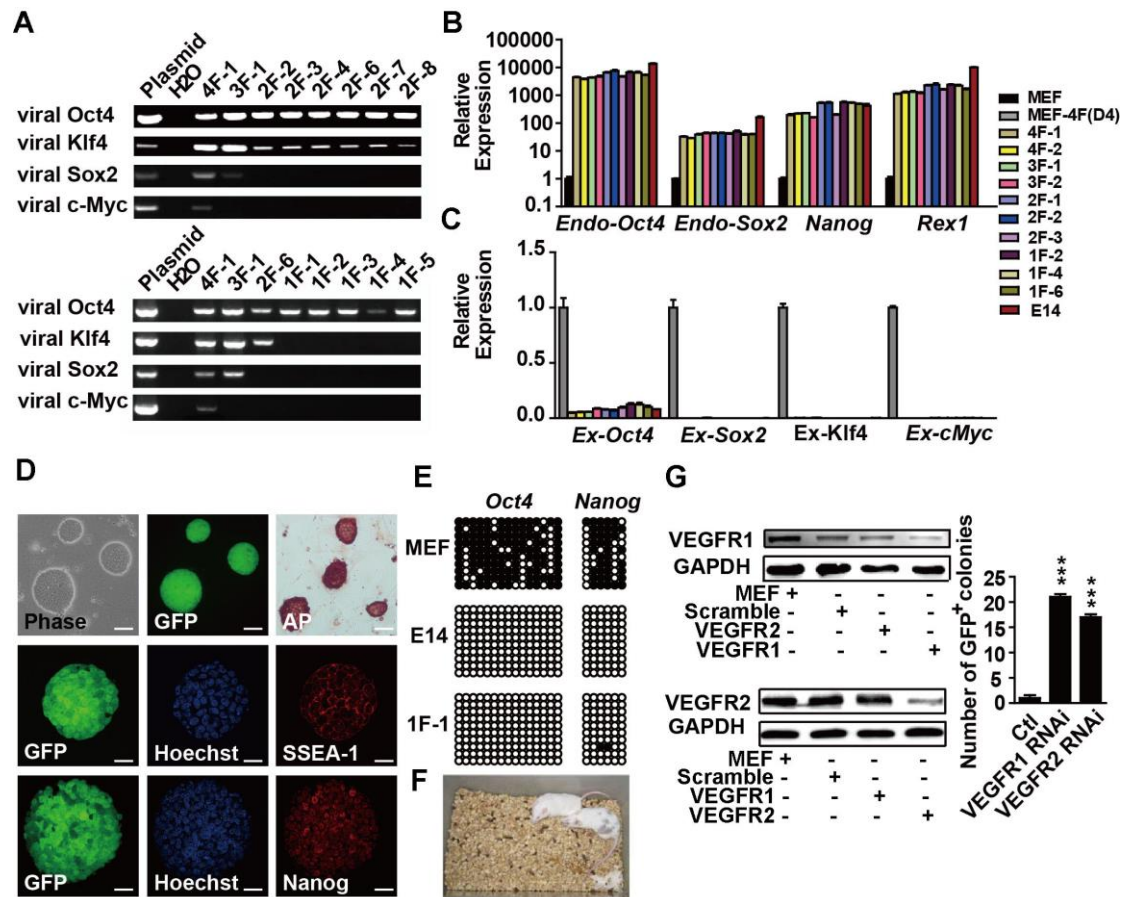

**Supplementary information, Figure S8** Sunitinib promotes factor-mediated reprogramming of MEFs.

(A) PCR analysis of integration of exogenous genes in indicated iPSC clones induced by 1-4 transcription factors plus sunitinib. (B)&(C) qRT-PCR analysis of the expression of pluripotency genes (B) and the silence of exogenous genes (C) in indicated iPSC clones induced by 1-4 transcription factors plus sunitinib. MEFs and MEFs infected with 4F for 4 days (MEF-4F (D4)) were used as controls. Data are mean  $\pm$  SEM (n=3). (D) Top: morphology, GFP expression and AP staining of iPSC clone (2F-6) induced with 2F plus sunitinib (1  $\mu$ M) (Scale bar: 50  $\mu$ m). Middle and bottom: immunofluorescent staining of SSEA-1 (middle) and Nanog (bottom) in clone 2F-6 (Scale bar: 10  $\mu$ m). (E) DNA methylation profile of the Nanog and Oct4 proximal promoter in MEF, E14, and iPSC clone induced by Oct4 and sunitinib (1F-1). (F) A chimeric mouse produced with iPSC clone 2F-6. (G) Western blot evaluation of the knockdown efficiency of VEGFR1 and VEGFR2 (left panel). VEGFR1 or VEGFR2 knockdown enhanced iPSC generation relative to scrambled shRNA (control, right panel). Data are mean  $\pm$  SEM (n=3), \*\*\*p < 0.001 vs control.
