# Supplementary material for: Blocking autocrine VEGF signaling by sunitinib, an anti-cancer drug, promotes embryonic stem cell self-renewal and somatic cell reprogramming
Source: PubMed Central journal article supplement — Cell Res. 2014 Aug 22;24(9):1121–36. doi: 10.1038/cr.2014.112 (PMC4152737; doi:10.1038/cr.2014.112), 2014-08-22
Supplement: cr2014112x9.pdf [file cr2014112x9.pdf]

**Supplementary information, Table S1** The efficiency of teratoma formation

|                        | LIF-P11 | Sunitinib-P11 | 2i-P11 |
|------------------------|---------|---------------|--------|
| Injection No.          | 5       | 6             | 5      |
| Teratoma formation No. | 5       | 6             | 5      |
| The rate of tumor      | 100%    | 100%          | 100%   |
